# Supplementary material for: The Impact of Diagnostic Criteria for Gestational Diabetes Mellitus on Adverse Maternal Outcomes: A Systematic Review and Meta-Analysis
Source: MDPI journal article supplement (doi:10.3390/jcm10040666), 2021-02-09
Supplement: s1 [file s1]

# Supplementary material:

**Table S1.** Quality assessment of studies using the Newcastle–Ottawa Quality Assessment Scale for cohort studies.

| Author, year              | Representative<br>ness of the<br>exposed<br>cohort | Selection                                 |                                  |                                                | Comparability                                                                               |                                                                                                                             | Outcome                                  |                                        |    | Total<br>scores |
|---------------------------|----------------------------------------------------|-------------------------------------------|----------------------------------|------------------------------------------------|---------------------------------------------------------------------------------------------|-----------------------------------------------------------------------------------------------------------------------------|------------------------------------------|----------------------------------------|----|-----------------|
|                           |                                                    | Selection of the<br>non-exposed<br>cohort | Ascertainm<br>ent of<br>exposure | No outcome of<br>interest at start of<br>study | A: Study controls<br>for age and/or<br>BMI<br>B: Study controls<br>for other<br>confounders | A: doctor's diagnosis OR<br>objective measurements<br>B: parent/self-reported<br>doctor's diagnosis OR use of<br>medication | Follow-up long<br>enough for<br>outcomes | Adequacy of<br>follow up of<br>cohorts |    |                 |
| Capula et al.<br>2013     | *                                                  | *                                         | *                                | *                                              | **                                                                                          | *                                                                                                                           | *                                        | *                                      | 9* |                 |
| Karmon et al.<br>2009     | *                                                  | *                                         | *                                | *                                              |                                                                                             | *                                                                                                                           | *                                        | *                                      | 7* |                 |
| Moses et al.<br>1995      | *                                                  | *                                         | *                                | *                                              |                                                                                             | *                                                                                                                           | *                                        | *                                      | 7* |                 |
| Waters et al.<br>2016     | *                                                  | *                                         | *                                | *                                              | **                                                                                          | *                                                                                                                           | *                                        | *                                      | 9* |                 |
| Gu et al.<br>2019         | *                                                  | *                                         |                                  | *                                              | **                                                                                          | *                                                                                                                           | *                                        | *                                      | 8* |                 |
| Anderberg et<br>al. 2010  | *                                                  | *                                         |                                  | *                                              | **                                                                                          | *                                                                                                                           | *                                        | *                                      | 8* |                 |
| Avalos et al.<br>2013     | *                                                  | *                                         | *                                | *                                              |                                                                                             | *                                                                                                                           | *                                        | *                                      | 7* |                 |
| Wahabi et al.<br>2017     | *                                                  | *                                         | *                                | *                                              | **                                                                                          | *                                                                                                                           | *                                        | *                                      | 9* |                 |
| Meek et al.<br>2015       | *                                                  | *                                         | *                                | *                                              | **                                                                                          | *                                                                                                                           | *                                        | *                                      | 9* |                 |
| Boghossian<br>et al. 2014 | *                                                  | *                                         | *                                | *                                              | **                                                                                          | *                                                                                                                           | *                                        | *                                      | 9* |                 |
| Kawakita<br>et al. 2017   | *                                                  | *                                         | *                                | *                                              |                                                                                             | *                                                                                                                           | *                                        | *                                      | 7* |                 |
| Brand et al.<br>2018      | *                                                  | *                                         | *                                | *                                              | **                                                                                          | *                                                                                                                           | *                                        | *                                      | 9* |                 |
| Kaul et al.<br>2014       | *                                                  | *                                         | *                                | *                                              | **                                                                                          | *                                                                                                                           | *                                        | *                                      | 9* |                 |

| Author, year               | Selection                                          |                                           |                                  |                                                | Comparability                                                                               | Outcome                                                                                                                     |                                          |                                        |                 |
|----------------------------|----------------------------------------------------|-------------------------------------------|----------------------------------|------------------------------------------------|---------------------------------------------------------------------------------------------|-----------------------------------------------------------------------------------------------------------------------------|------------------------------------------|----------------------------------------|-----------------|
|                            | Representative<br>ness of the<br>exposed<br>cohort | Selection of the<br>non-exposed<br>cohort | Ascertainm<br>ent of<br>exposure | No outcome of<br>interest at start of<br>study | A: Study controls<br>for age and/or<br>BMI<br>B: Study controls<br>for other<br>confounders | A: doctor's diagnosis OR<br>objective measurements<br>B: parent/self-reported<br>doctor's diagnosis OR use of<br>medication | Follow-up long<br>enough for<br>outcomes | Adequacy of<br>follow up of<br>cohorts | Total<br>scores |
| Kgosidialwa<br>et al. 2015 | *                                                  | *                                         | *                                | *                                              |                                                                                             | *                                                                                                                           | *                                        | *                                      | 7*              |
| Donovan et<br>al. 2017     | *                                                  | *                                         | *                                | *                                              | *                                                                                           | *                                                                                                                           | *                                        | *                                      | 8*              |
| Kieffer et al.,<br>1999    | *                                                  | *                                         | *                                | *                                              | *                                                                                           | *                                                                                                                           | *                                        | *                                      | 8*              |
| Ekeroma et<br>al. 2014     | *                                                  | *                                         | *                                | *                                              | *                                                                                           | *                                                                                                                           | *                                        | *                                      | 8*              |
| Aung et al.<br>2015        | *                                                  |                                           | *                                | *                                              |                                                                                             | *                                                                                                                           | *                                        | *                                      | 6*              |
| Gortazar et<br>al. 2018    | *                                                  | *                                         | *                                | *                                              | **                                                                                          | *                                                                                                                           | *                                        | *                                      | 9*              |
| Zamstein et<br>al. 2018    | *                                                  | *                                         | *                                | *                                              | **                                                                                          | *                                                                                                                           | *                                        | *                                      | 9*              |
| Hedderson<br>et al. 2003   | *                                                  | *                                         | *                                | *                                              | *                                                                                           | *                                                                                                                           | *                                        | *                                      | 8*              |
| Hosseini et<br>al. 2018    | *                                                  | *                                         | *                                | *                                              | *                                                                                           | *                                                                                                                           | *                                        | *                                      | 8*              |
| Hosseini et<br>al. 2018    | *                                                  | *                                         | *                                | *                                              | **                                                                                          | *                                                                                                                           | *                                        | *                                      | 9*              |
| Jain et al.<br>2016        | *                                                  | *                                         |                                  | *                                              |                                                                                             | *                                                                                                                           | *                                        | *                                      | 6*              |
| Kun et al.<br>2010         | *                                                  | *                                         | *                                | *                                              |                                                                                             | *                                                                                                                           | *                                        | *                                      | 7*              |
| Leybovitz et<br>al. 2018   | *                                                  | *                                         | *                                | *                                              | *                                                                                           | *                                                                                                                           | *                                        | *                                      | 8*              |
| Jacobson<br>et al. 1989    | *                                                  | *                                         | *                                | *                                              |                                                                                             | *                                                                                                                           | *                                        | *                                      | 7*              |
| Pan et al.<br>2015         | *                                                  | *                                         | *                                | *                                              | *                                                                                           | *                                                                                                                           | *                                        | *                                      | 8*              |

| Author, year              | Selection                                          |                                           |                                  |                                                | Comparability                                                                               |                                                                                                                             | Outcome                                  |                                        |                 |
|---------------------------|----------------------------------------------------|-------------------------------------------|----------------------------------|------------------------------------------------|---------------------------------------------------------------------------------------------|-----------------------------------------------------------------------------------------------------------------------------|------------------------------------------|----------------------------------------|-----------------|
|                           | Representative<br>ness of the<br>exposed<br>cohort | Selection of the<br>non-exposed<br>cohort | Ascertainm<br>ent of<br>exposure | No outcome of<br>interest at start of<br>study | A: Study controls<br>for age and/or<br>BMI<br>B: Study controls<br>for other<br>confounders | A: doctor's diagnosis OR<br>objective measurements<br>B: parent/self-reported<br>doctor's diagnosis OR use of<br>medication | Follow-up long<br>enough for<br>outcomes | Adequacy of<br>follow up of<br>cohorts | Total<br>scores |
| Son et al.<br>2014        | *                                                  | *                                         | *                                | *                                              | **                                                                                          | *                                                                                                                           | *                                        | *                                      | 9*              |
| Katterfeld et<br>al. 2011 | *                                                  | *                                         | *                                | *                                              | **                                                                                          | *                                                                                                                           | *                                        | *                                      | 9*              |
| Sacks et al.<br>2015      | *                                                  | *                                         | *                                | *                                              | **                                                                                          | *                                                                                                                           | *                                        | *                                      | 9*              |
| Oster et al.<br>2014      | *                                                  | *                                         |                                  | *                                              | *                                                                                           | *                                                                                                                           | *                                        | *                                      | 7*              |
| Soliman et al.<br>2018    | *                                                  | *                                         |                                  | *                                              |                                                                                             | *                                                                                                                           | *                                        | *                                      | 6*              |
| Xiong et al.<br>2001      | *                                                  | *                                         | *                                | *                                              | *                                                                                           | *                                                                                                                           | *                                        | *                                      | 8*              |
| Sugaya et<br>al., 2000    | *                                                  | *                                         | *                                | *                                              |                                                                                             | *                                                                                                                           | *                                        | *                                      | 7*              |
| Nerenberg et<br>al. 2013  | *                                                  | *                                         | *                                | *                                              | **                                                                                          | *                                                                                                                           | *                                        | *                                      | 9*              |
| Edith et al.<br>2006      | *                                                  | *                                         | *                                | *                                              | *                                                                                           | *                                                                                                                           | *                                        | *                                      | 8*              |
| Goswami et<br>al. 2014    | *                                                  | *                                         |                                  | *                                              |                                                                                             | *                                                                                                                           | *                                        | *                                      | 6*              |
| Ellerbe et al.<br>2013    | *                                                  | *                                         | *                                | *                                              | *                                                                                           | *                                                                                                                           | *                                        | *                                      | 8*              |
| Sletner et al.<br>2017    | *                                                  | *                                         | *                                | *                                              | *                                                                                           | *                                                                                                                           | *                                        | *                                      | 8*              |
| Zeki et al.<br>2018       | *                                                  | *                                         |                                  | *                                              | **                                                                                          | *                                                                                                                           | *                                        | *                                      | 8*              |
| Hoorn et al.<br>2002      | *                                                  | *                                         | *                                | *                                              |                                                                                             | *                                                                                                                           | *                                        | *                                      | 7*              |
| Su et al. 2019            | *                                                  | *                                         | *                                | *                                              | **                                                                                          | *                                                                                                                           | *                                        | *                                      | 9*              |
| Metcalfe et<br>al. 2017   | *                                                  | *                                         | *                                | *                                              | *                                                                                           | *                                                                                                                           | *                                        | *                                      | 8*              |

| Author, year             | Selection                                          |                                           |                                  |                                                | Comparability                                                                               | Outcome                                                                                                                     |                                          |                                        |                 |
|--------------------------|----------------------------------------------------|-------------------------------------------|----------------------------------|------------------------------------------------|---------------------------------------------------------------------------------------------|-----------------------------------------------------------------------------------------------------------------------------|------------------------------------------|----------------------------------------|-----------------|
|                          | Representative<br>ness of the<br>exposed<br>cohort | Selection of the<br>non-exposed<br>cohort | Ascertainm<br>ent of<br>exposure | No outcome of<br>interest at start of<br>study | A: Study controls<br>for age and/or<br>BMI<br>B: Study controls<br>for other<br>confounders | A: doctor's diagnosis OR<br>objective measurements<br>B: parent/self-reported<br>doctor's diagnosis OR use of<br>medication | Follow-up long<br>enough for<br>outcomes | Adequacy of<br>follow up of<br>cohorts | Total<br>scores |
| Car et al.<br>2011       | *                                                  | *                                         | *                                | *                                              | *                                                                                           | *                                                                                                                           | *                                        | *                                      | 8*              |
| Lamminpää<br>et al. 2014 | *                                                  | *                                         | *                                | *                                              | *                                                                                           | *                                                                                                                           | *                                        | *                                      | 8*              |
| Black et al.<br>2010     | *                                                  | *                                         | *                                | *                                              | **                                                                                          | *                                                                                                                           | *                                        | *                                      | 9*              |

Table S2. Quality assessment of included studies using the Newcastle–Ottawa Quality Assessment Scale for cross-sectional study.

| Author, year        | Selection                                |                |                        | Comparability                                         |                                                                                    | Outcome                                |                     | Total scores |
|---------------------|------------------------------------------|----------------|------------------------|-------------------------------------------------------|------------------------------------------------------------------------------------|----------------------------------------|---------------------|--------------|
|                     | Representative<br>ness of the<br>samples | Sample<br>size | Non-<br>responder<br>s | Ascertainm<br>ent of the<br>exposure<br>(risk factor) | A: study controls for<br>age and/or BMI<br>B: control for any<br>additional factor | Assessment of the<br>outcome           |                     |              |
|                     |                                          |                |                        |                                                       |                                                                                    | a) Independent blind<br>assessment. ** | Statistical<br>test |              |
|                     |                                          |                |                        |                                                       |                                                                                    | b) Record linkage. **                  |                     |              |
|                     |                                          |                |                        |                                                       |                                                                                    | c) Self report. *                      |                     |              |
| Erjavec et al. 2016 | *                                        |                | *                      | *                                                     |                                                                                    | **                                     | *                   | 6*           |
| Shand et al. 2008   | *                                        |                | *                      | *                                                     | **                                                                                 | **                                     | *                   | 8*           |

A:

| Author, year                                                                                                                                                                                                                                                                                                                                                                                                                            | Bias in assessment of exposure (Risk factor)                                      | Bias in development of outcome of interest in case and controls                   | Bias in selection of cases                                                        | Bias in selection of controls                                                      | Bias in control of prognostic variable (without case and control matching or adjustment in statistical methods) |
|-----------------------------------------------------------------------------------------------------------------------------------------------------------------------------------------------------------------------------------------------------------------------------------------------------------------------------------------------------------------------------------------------------------------------------------------|-----------------------------------------------------------------------------------|-----------------------------------------------------------------------------------|-----------------------------------------------------------------------------------|------------------------------------------------------------------------------------|-----------------------------------------------------------------------------------------------------------------|
| Erjavec et al., 2016                                                                                                                                                                                                                                                                                                                                                                                                                    |  |  |  |  |                              |
| Shand et al., 2008                                                                                                                                                                                                                                                                                                                                                                                                                      |  |  |  |  |                              |
|                                                                                                                                                                                                                                                                                                                                                                                                                                         |                                                                                   |                                                                                   |                                                                                   |                                                                                    |                                                                                                                 |
|  Definitely No (low risk of bias)  Probably no<br> Definitely yes (high risk of bias)  Probably Yes |                                                                                   |                                                                                   |                                                                                   |                                                                                    |                                                                                                                 |

B:.

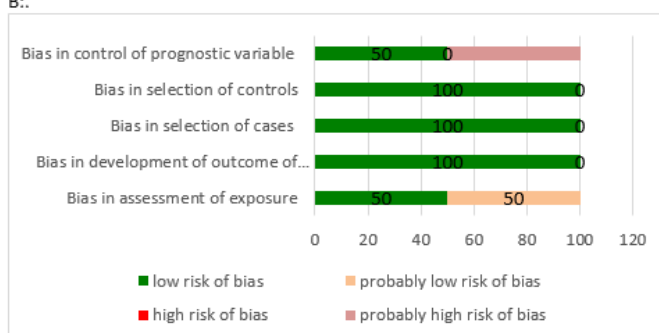

Figure S1. (A and B) Risk of bias in cross-sectional studies.

A:

| First Author, year      | Bias in selection of exposed and non-exposed cohorts | Bias in assessment of exposure | Bias in present of outcome of interest at start of study | Bias in control of prognostic variables (with matching or adjusting) | Bias in the assessment of the presence or absence of prognostic factors | Bias in the assessment of outcome | Bias in adequacy about follow up of cohorts |
|-------------------------|------------------------------------------------------|--------------------------------|----------------------------------------------------------|----------------------------------------------------------------------|-------------------------------------------------------------------------|-----------------------------------|---------------------------------------------|
| Capula et al. 2013      | ●                                                    | ●                              | ●                                                        | ●                                                                    | ●                                                                       | ●                                 | ●                                           |
| Karmon et al., 2009     | ●                                                    | ●                              | ●                                                        | ●                                                                    | ●                                                                       | ●                                 | ●                                           |
| Moses et al., 1995      | ●                                                    | ●                              | ●                                                        | ●                                                                    | ●                                                                       | ●                                 | ●                                           |
| Waters et al., 2016     | ●                                                    | ●                              | ●                                                        | ●                                                                    | ●                                                                       | ●                                 | ●                                           |
| Gu et al., 2019         | ●                                                    | ●                              | ●                                                        | ●                                                                    | ●                                                                       | ●                                 | ●                                           |
| Anderberg et al., 2010  | ●                                                    | ●                              | ●                                                        | ●                                                                    | ●                                                                       | ●                                 | ●                                           |
| Avalos et al., 2013     | ●                                                    | ●                              | ●                                                        | ●                                                                    | ●                                                                       | ●                                 | ●                                           |
| Wahabi et al., 2017     | ●                                                    | ●                              | ●                                                        | ●                                                                    | ●                                                                       | ●                                 | ●                                           |
| Meek et al., 2015       | ●                                                    | ●                              | ●                                                        | ●                                                                    | ●                                                                       | ●                                 | ●                                           |
| Boghossian et al., 2014 | ●                                                    | ●                              | ●                                                        | ●                                                                    | ●                                                                       | ●                                 | ●                                           |
| Kawakita et al., 2017   | ●                                                    | ●                              | ●                                                        | ●                                                                    | ●                                                                       | ●                                 | ●                                           |
| Brand et al., 2018      | ●                                                    | ●                              | ●                                                        | ●                                                                    | ●                                                                       | ●                                 | ●                                           |
| Kaul et al., 2014       | ●                                                    | ●                              | ●                                                        | ●                                                                    | ●                                                                       | ●                                 | ●                                           |

| First Author, year              | Bias in selection of exposed and non-exposed cohorts | Bias in assessment of exposure | Bias in present of outcome of interest at start of study | Bias in control of prognostic variables (with matching or adjusting) | Bias in the assessment of the presence or absence of prognostic factors | Bias in the assessment of outcome | Bias in adequacy about follow up of cohorts |
|---------------------------------|------------------------------------------------------|--------------------------------|----------------------------------------------------------|----------------------------------------------------------------------|-------------------------------------------------------------------------|-----------------------------------|---------------------------------------------|
| Kgosidialwa et al., 2015        | ●                                                    | ●                              | ●                                                        | ●                                                                    | ●                                                                       | ●                                 | ●                                           |
| Donovan et al., 2017            | ●                                                    | ●                              | ●                                                        | ●                                                                    | ●                                                                       | ●                                 | ●                                           |
| Kieffer et al., 1999            | ●                                                    | ●                              | ●                                                        | ●                                                                    | ●                                                                       | ●                                 | ●                                           |
| Ekeroma et al., 2014            | ●                                                    | ●                              | ●                                                        | ●                                                                    | ●                                                                       | ●                                 | ●                                           |
| Aung et al., 2015               | ●                                                    | ●                              | ●                                                        | ●                                                                    | ●                                                                       | ●                                 | ●                                           |
| Gortazar et al., 2018           | ●                                                    | ●                              | ●                                                        | ●                                                                    | ●                                                                       | ●                                 | ●                                           |
| Zamstein et al., 2018           | ●                                                    | ●                              | ●                                                        | ●                                                                    | ●                                                                       | ●                                 | ●                                           |
| Hedderson et al., 2003          | ●                                                    | ●                              | ●                                                        | ●                                                                    | ●                                                                       | ●                                 | ●                                           |
| Hosseini et al., 2018           | ●                                                    | ●                              | ●                                                        | ●                                                                    | ●                                                                       | ●                                 | ●                                           |
| Hosseini et al., 2018           | ●                                                    | ●                              | ●                                                        | ●                                                                    | ●                                                                       | ●                                 | ●                                           |
| Jain et al., 2016               | ●                                                    | ●                              | ●                                                        | ●                                                                    | ●                                                                       | ●                                 | ●                                           |
| Kun et al., 2010                | ●                                                    | ●                              | ●                                                        | ●                                                                    | ●                                                                       | ●                                 | ●                                           |
| Leybovitz-Haleluya et al., 2018 | ●                                                    | ●                              | ●                                                        | ●                                                                    | ●                                                                       | ●                                 | ●                                           |
| Jacobson et al., 1989           | ●                                                    | ●                              | ●                                                        | ●                                                                    | ●                                                                       | ●                                 | ●                                           |

| First Author, year           | Bias in selection of exposed and non-exposed cohorts | Bias in assessment of exposure | Bias in present of outcome of interest at start of study | Bias in control of prognostic variables (with matching or adjusting) | Bias in the assessment of the presence or absence of prognostic factors | Bias in the assessment of outcome | Bias in adequacy about follow up of cohorts |
|------------------------------|------------------------------------------------------|--------------------------------|----------------------------------------------------------|----------------------------------------------------------------------|-------------------------------------------------------------------------|-----------------------------------|---------------------------------------------|
| Pan et al., 2015             | ●                                                    | ●                              | ●                                                        | ●                                                                    | ●                                                                       | ●                                 | ●                                           |
| Son et al., 2014             | ●                                                    | ●                              | ●                                                        | ●                                                                    | ●                                                                       | ●                                 | ●                                           |
| Katterfeld et al., 2011      | ●                                                    | ●                              | ●                                                        | ●                                                                    | ●                                                                       | ●                                 | ●                                           |
| Sacks et al., 2015           | ●                                                    | ●                              | ●                                                        | ●                                                                    | ●                                                                       | ●                                 | ●                                           |
| Soliman et al., 2018         | ●                                                    | ●                              | ●                                                        | ●                                                                    | ●                                                                       | ●                                 | ●                                           |
| Xiong et al., 2001           | ●                                                    | ●                              | ●                                                        | ●                                                                    | ●                                                                       | ●                                 | ●                                           |
| Oster et al., 2014           | ●                                                    | ●                              | ●                                                        | ●                                                                    | ●                                                                       | ●                                 | ●                                           |
| Sugaya et al., 2000          | ●                                                    | ●                              | ●                                                        | ●                                                                    | ●                                                                       | ●                                 | ●                                           |
| Nerenberg et al., 2013       | ●                                                    | ●                              | ●                                                        | ●                                                                    | ●                                                                       | ●                                 | ●                                           |
| Edith et al., 2006           | ●                                                    | ●                              | ●                                                        | ●                                                                    | ●                                                                       | ●                                 | ●                                           |
| Goswami Mahanta et al., 2014 | ●                                                    | ●                              | ●                                                        | ●                                                                    | ●                                                                       | ●                                 | ●                                           |
| Ellerbe et al. 2013          | ●                                                    | ●                              | ●                                                        | ●                                                                    | ●                                                                       | ●                                 | ●                                           |
| Sletner et al., 2017         | ●                                                    | ●                              | ●                                                        | ●                                                                    | ●                                                                       | ●                                 | ●                                           |

| First Author, year     | Bias in selection of exposed and non-exposed cohorts | Bias in assessment of exposure | Bias in present of outcome of interest at start of study | Bias in control of prognostic variables (with matching or adjusting) | Bias in the assessment of the presence or absence of prognostic factors | Bias in the assessment of outcome | Bias in adequacy about follow up of cohorts |
|------------------------|------------------------------------------------------|--------------------------------|----------------------------------------------------------|----------------------------------------------------------------------|-------------------------------------------------------------------------|-----------------------------------|---------------------------------------------|
| Zeki et al., 2018      | ●                                                    | ●                              | ●                                                        | ●                                                                    | ●                                                                       | ●                                 | ●                                           |
| Hoorn et al., 2002     | ●                                                    | ●                              | ●                                                        | ●                                                                    | ●                                                                       | ●                                 | ●                                           |
| Su et al., 2019        | ●                                                    | ●                              | ●                                                        | ●                                                                    | ●                                                                       | ●                                 | ●                                           |
| Metcalf et al., 2017   | ●                                                    | ●                              | ●                                                        | ●                                                                    | ●                                                                       | ●                                 | ●                                           |
| Car et al., 2011       | ●                                                    | ●                              | ●                                                        | ●                                                                    | ●                                                                       | ●                                 | ●                                           |
| Lamminpää et al., 2014 | ●                                                    | ●                              | ●                                                        | ●                                                                    | ●                                                                       | ●                                 | ●                                           |
| Black et al., 2010     | ●                                                    | ●                              | ●                                                        | ●                                                                    | ●                                                                       | ●                                 | ●                                           |

● Definitely No (low risk of bias)    ● Probably no  
 ● Definitely yes (high risk of bias)    ● Probably Yes

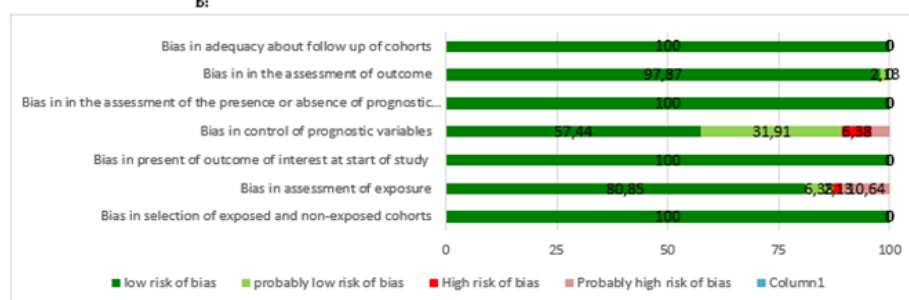

Figure S2. (A and B). Risk of bias in cohort studies.
